# Supplementary material
Source: MDPI journal article supplement (https://www.mdpi.com/2673-6489/1/3/21)
Supplement: s1 [file s1]

## Supplementary Tables

**Table S1.** Nucleotide BLAST summary. Results with F63 and R533 primers against proposed bacterial genera.

| Genre                    | Species              | Strain         | Starting position (base number) | Final position (base number) | Amplified region (base pairs) |
|--------------------------|----------------------|----------------|---------------------------------|------------------------------|-------------------------------|
| <i>Acidimicrobium</i>    | <i>ferrooxidans</i>  | DSM 10332      | 39                              | 490                          | 451                           |
|                          | <i>acidophilum</i>   | MS Silver      | 22                              | 460                          | 438                           |
|                          | <i>angustum</i>      | KLB            | 22                              | 456                          | 434                           |
| <i>Acidiphilium</i>      | <i>cryptum</i>       | DSM 2389/Lhet2 | 22                              | 454                          | 432                           |
|                          | <i>multivorum</i>    | AIU 301        | 42                              | 474                          | 432                           |
|                          | <i>organovorum</i>   | TFC            | 22                              | 454                          | 432                           |
|                          | <i>albertensis</i>   | DSM 14366      | 29                              | 509                          | 480                           |
|                          | <i>calvus</i>        | KU             | 19                              | 501                          | 482                           |
|                          | <i>ferridurans</i>   | ATCC 33020     | 18                              | 498                          | 480                           |
| <i>Acidithiobacillus</i> | <i>ferriphilus</i>   | M20            | 6                               | 486                          | 480                           |
|                          | <i>ferrivorans</i>   | NO 37          | 39                              | 519                          | 480                           |
|                          | <i>ferrooxidans</i>  | ATCC 23270     | 39                              | 519                          | 480                           |
|                          | <i>thiooxidans</i>   | ATCC 19377     | 14                              | 494                          | 480                           |
| <i>Acidobacterium</i>    | <i>capsulatum</i>    | ATCC 51196     | 39                              | 484                          | 445                           |
|                          | <i>acetivorans</i>   | A63            | 43                              | 543                          | 500                           |
|                          | <i>amilsii</i>       | TR1            | 39                              | 536                          | 497                           |
| <i>Desulfurella</i>      | <i>kamshatkensis</i> | K 119          | 15                              | 515                          | 500                           |
|                          | <i>multipotens</i>   | RH 8           | 15                              | 515                          | 500                           |
|                          | <i>propionica</i>    | U 8            | 15                              | 515                          | 500                           |
| <i>Leptospirillum</i>    | <i>ferriphilum</i>   | P3a            | 27                              | 525                          | 498                           |
|                          | <i>ferrooxidans</i>  | L15            | 19                              | 517                          | 498                           |

**Table S2.** Sequences obtained from the original and the adapted communities after cloning process

| T6-OC1                                                                                                                                                                                                                                                                                                                                                                                                                                                                                                                                                                                                                                                                                                                                                            |
|-------------------------------------------------------------------------------------------------------------------------------------------------------------------------------------------------------------------------------------------------------------------------------------------------------------------------------------------------------------------------------------------------------------------------------------------------------------------------------------------------------------------------------------------------------------------------------------------------------------------------------------------------------------------------------------------------------------------------------------------------------------------|
| TACGACTCACTATAGGGCGAATTGGGCCCCGACGTCGCATGCTCCCGGCCGCCATGGCGG<br>CCGCGGGAATTCGATT <b>CAGGCCTAACACATGCAAGTC</b> GAACGGTAACAGGTCTTCGGAT<br>GCTGACGAGTGGCGGACGGGTGAGTAATGCGTAGGAATCTGTCTTTTAGTGGGGGACAA<br>CCCAGGGAAACTTGGGCTAATACCGCATGAGCCCTGAGGGGGAAAGCGGGGGATCTTCG<br>GACCTCGCGCTAAGAGAGGAGCCTACGTCCGATTAGCTAGTTGGCGGGGTAAAGGCCCA<br>CCAAGGCGACGATCGGTAGCTGGTCTGAGAGGACGACCAGCCACACTGGGACTGAGACA<br>CGGCCCAGACTCCTACGGGAGGCAGCAGTGGGGAATTTTTCGCAATGGGGGCAACCCTG<br>ACGAAGCAATGCCGCGTGGATGAAGAAGGCCTTCGGGTGTAAAGTCCTTTCGTGGAGG<br>ACGAAAAGGTGGGTCTAATAACAATCTGCTATTGACGTGAATCCAAGAAGAAGCACCGG<br>CTAACTCCGT <b>GCCAGCAGCCGCGTAATA</b> AATCACTAGTGAATTCGCGGCCGCCTGCAGG<br>TCGACCATATGGGAGAGCTCCCAACGCGTTGGATGCATAGCTTGAGTATTCTATAGTGT<br>CACCTAAATAGCTTGGCGTAATCATG |
| T6-OC2                                                                                                                                                                                                                                                                                                                                                                                                                                                                                                                                                                                                                                                                                                                                                            |
| TTGGGCCCCGACGTCGCATGCTCCCGGCCGCCATGGCGGCCGCGGAATTCGATT <b>CAGGC</b><br><b>CTAACACATGCAAGTC</b> GAACGGTAACAGGTCTTCGGATGCTGACGAGTGGCGGACGGGT<br>GAGTAATGCGTAGGAATCTGTCTTTTAGTGGGGGACAACCCAGGGAAACTTGGGCTAAT<br>ACCGCATGAGCCCTGAGGGGGAAAGCGGGGGATCTTCGGACCTCGCGCTAAGAGAGGAG<br>CCTACGTCCGATTAGCTAGTTGGCGGGGTAAAGGCCACCAAGGCGACGATCGGTAGCT<br>GGTCTGAGAGGACGACCAGCCACACTGGGACTGAGACACGGCCCAGACTCCTACGGGAG<br>GCAGCAGTGGGGAATTTTTCGCAATGGGGGCAACCCTGACGAAGCAATGCCGCGTGGAT<br>GAAGAAGGCCTTCGGGTGTAAAGTCCTTTCGTGGAGGACGAAAAGGTGGGTCTAATA<br>CAATCTGCTATTGACGTGAATCCAAGAAGAAGCACCGGCTAACTCCGT <b>GCCAGCAGCCG</b><br><b>CGGTAATA</b> AATCACTAGTGAATTCGCGGCCGCCTGCAGGTCGACCATATGGGAGAGCTCC<br>CAACGCGTTGGATGCATAGCTTGAGTATTCTATAGTGTCACCTAAATAGCTTGGCGTAA<br>TCATG          |
| T6-OC3                                                                                                                                                                                                                                                                                                                                                                                                                                                                                                                                                                                                                                                                                                                                                            |
| TACGACTCACTATAGGGCGAATTGGGCCCCGAACGTCGCATGCTCCCGGCCGCCATGGCG<br>GCCGCGGGAATTCGATT <b>CAGGCCTAACACATGCAAGTC</b> GAACGGTAACAGGTCTTCGGA<br>TGCTGACGAGTGGCGGACGGGTGAGTAATGCGTAGGAATCTGTCTTTTAGTGGGGGACA<br>ACCCAGGGAAACTTGGGCTAATACCGCATGAGCCCTGAGGGGGAAAGCGGGGGATCTTC<br>GGACCTCGCGCTAAGAGAGGAGCCTACGTCCGATTAGCTAGTTGGCGGGGTAAAGGCC<br>ACCAAGGCGACGATCGGTAGCTGGTCTGAGAGGACGACCAGCCACACTGGGACTGAGAC<br>ACGGCCCAGACTCCTAGGGGAGGCAGCAGTGGGGAATTTTTCGCAATGGGGGCAACCCT<br>GACGAAGCAATGCCGCGTGGATGAAGAAGGCCTCCGGGTGTAGAGTCCTTTCGTGGAG<br>GACGAAAAGGTGGGTCTAATAACAATCTGCTATTGACGTGAATCCAAGAAGAAGCACCG<br>GCTAACTCCGT <b>GCCAGCAGCCGCGTAATA</b> AATCACTAGTGAATTCGCGGCCGCCTGCAG<br>GTGACCATATGGGAGAGCTCCCAACGCGTTGGATGCATAGCTTGAGTATTCTATAGTG<br>TCACCTAAATAGCT               |
| T6-OC4                                                                                                                                                                                                                                                                                                                                                                                                                                                                                                                                                                                                                                                                                                                                                            |
| TACGACTCACTATAGGGCGATTGGGCCCCGACGTCGCATGCTCCCGGCCGCCATGGCGGC<br>CGCGGGAATTCGATT <b>CAGGCCTAACACATGCAAGTC</b> GAACGGTAACAGGTCTTCGGATG<br>CTGACGAGTGGCGGACGGGTGAGTAATGCGTAGGAATCTGTCTTTTAGTGGGGGACAAC                                                                                                                                                                                                                                                                                                                                                                                                                                                                                                                                                               |

CCAGGGAAACTTGGGCTAATACCGCATGAGCCCTGAGGGGGAAAGCGGGGGATCTTCGG  
ACCTCGCGCTAAGAGAGGAGCCTACGTCCGATTAGCTAGTTGGCGGGGTAAAGGCCAC  
CAAGGCGACGATCGGTAGCTGGTCTGAGAGGACGACCAGCCACACTGGGACTGAGACAC  
GGCCCAGACTCCTACGGGAGGCAGCAGTGGGGAATTTTTCGCAATGGGGGCAACCTGA  
CGAAGCAATGCCGCGTGGATGAAGAAGGCCTTCGGGTTGTAAAGTCCTTTCGTGGAGGA  
CGAAAAGGTGGGTTCTAATACAATCTGCTATTGACGTGAATCCAAGAAGAAGCACCGGC  
TAACTCCGTGCCAGCAGCCGCGGTAATAATCACTAGTGAATTCGCGGCCGCCTGCAGGT  
CGACCATATGGGAGAGCTCCCAACGCGTTGGATGCATAGCTTGAGTATTCTATAGTGTC  
ACCTAAATAGCTTGGCGTAATCATG

#### T6-OC5

TACGACTCACTATAGGGCGAATTGGGCCCGACGTTCGCATGCTCCCGGCCGCCATGGCGG  
CCGCGGGAATTCGATT**CAGGCCTAACACATGCAAGTC**GAACGGTAACAGGTCTTCGGAT  
GCTGACGAGTGGCGGACGGGTGAGTAATGCGTAGGAATCTGTCTTTTAGTGGGGGACAA  
CCCAGGGAAACTTGGGCTAATACCGCATGAGCCCTGAGGGGGAAAGCGGGGGATCTTCG  
GACCTCGCGCTAAGAGAGGAGCCTACGTCCGATTAGCTAGTTGGCGGGGTAAAGGCCCA  
CCAAGGCGACGATCGGTAGCTGGTCTGAGAGGACGACCAGCCACACTGGGACTGAGACA  
CGGCCCAGACTCCTACGGGAGGCAGCAGTGGGGAATTTTTCGCAATGGGGGCAACCTG  
ACGAAGCAATGCCGCGTGGATGAAGAAGGCCTTCGGGTTGTAAAGTCCTTTCGTGGAGG  
ACGAAAAGGTGGGTTCTAATACAATCTGCTATTGACGTGAATCCAAGAAGAAGCACCGG  
CTAACTCCGTGCCAGCAGCCGCGGTAATAATCACTAGTGAATTCGCGGCCGCCTGCAGG  
TCGACCATATGGGAGAGCTCCCAACGCGTTGGATGCATAGCTTGAGTATTCTATAGTGT  
CACCTAAATAGCTTGGCGTAATCATG

#### T6-OC6

TACGACTCACTATAGGGCGAATTGGGCCCGACGTTCGCATGCTCCCGGCCGCCATGGCGG  
CCGCGGGAATTCGATT**CAGGCCTAACACATGCAAGTC**GAACGGTAACAGGTCTTCGGAT  
GCTGACGAGTGGCGGACGGGTGAGTAATGCGTAGGAATCTGTCTTTTAGTGGGGGACAA  
CCCAGGGAAACTTGGGCTAATACCGCATGAGCCCTGAGGGGGAAAGCGGGGGATCTTCG  
GACCTCGCGCTAAGAGAGGAGCCTACGTCCGATTAGCTAGTTGGCGGGGTAAAGGCCCA  
CCAAGGCGACGATCGGTAGCTGGTCTGAGAGGACGACCAGCCACACTGGGACTGAGACA  
CGGCCCAGACTCCTACGGGAGGCAGCAGTGGGGAATTTTTCGCAATGGGGGCAACCTG  
ACGAAGCAATGCCGCGTGGATGAAGAAGGCCTTCGGGTTGTAAAGTCCTTTCGTGGAGG  
ACGAAAAGGTGGGTTCTAATACAATCTGCTATTGACGTGAATCCAAGAAGAAGCACCGG  
CTAACTCCGTGCCAGCAGCCGCGGTAATAATCACTAGTGAATTCGCGGCCGCCTGCAGG  
TCGACCATATGGGAGAGCTCCCAACGCGTTGGATGCATAGCTTGAGTATTCTATAGTGT  
CACCTAAATAGCTTGGCGTAATCATG

#### T6-AC1

GTAATACGACTCACTATAGGGCGAATTGGGCCCGACGTTCGCATGCTCCCGGCCGCCATG  
GCGGCCGCGGGAATTCGATT**CAGGCCTAACACATGCAAGTC**GAACGGTAACAGGTCTTC  
GGATGCTGACGAGTGGCGGACGGGTGAGTAATGCGTAGGAATCTGTCTTTTAGTGGGGG  
ACAACCCAGGGAAACTTGGGCTAATACCGCATGAGCCCTGAGGGGGAAAGCGGGGGATC  
TTCGGACCTCGCGCTAAGAGAGGAGCCTACGTCCGATTAGCTAGTTGGCGGGGTAAAGG  
CCCACCAAGGCGACGATCGGTAGCTGGTCTGAGAGGACGACCAGCCACACTGGGACTGA  
GACACGGCCCAGACTCCTACGGGAGGCAGCAGTGGGGAATTTTTCGCAATGGGGGCAAC  
CCTGACGAAGCAATGCCGCGTGGATGAAGAAGGCCTTCGGGTTGTAAAGTCCTTTCGTG  
GAGGACGAAAAGGTGGGTTCTAATACAATCTGCTATTGACGTGAATCCAAGAAGAAGCA  
CCGGCTAACTCCGTGCCAGCAGCCGCGGTAATAATCACTAGTGAATTCGCGGCCGCCTG

|                                                                                                                                                                                                                                                                                                                                                                                                                                                                                                                                                                                                                                                                                                                                                                                                                        |
|------------------------------------------------------------------------------------------------------------------------------------------------------------------------------------------------------------------------------------------------------------------------------------------------------------------------------------------------------------------------------------------------------------------------------------------------------------------------------------------------------------------------------------------------------------------------------------------------------------------------------------------------------------------------------------------------------------------------------------------------------------------------------------------------------------------------|
| CAGGTCGACCATATGGGAGAGCTCCCAACGCGTTGGATGCATAGCTTGAGTATTCTATA<br>GTGTCACCTAAATAGCTTGGCGTAATCATG                                                                                                                                                                                                                                                                                                                                                                                                                                                                                                                                                                                                                                                                                                                          |
| <b>T6-AC2</b>                                                                                                                                                                                                                                                                                                                                                                                                                                                                                                                                                                                                                                                                                                                                                                                                          |
| ATTGTAATACGACTCACTATAGGGCGAATTGGGCCCGACGTGCGCATGCTCCCGGCCGCC<br>ATGGCGGCCGCGGGAATTCGATT <b>CAGGCCTAACACATGCAAGTCGAACGGTAACAGGTC</b><br><b>TTCGGATGCTGACGAGTGGCGGACGGGTGAGTAATGCGTAGGAATCTGTCTTTTAGTGG</b><br><b>GGGACAACCCAGGGAACTTGGGCTAATACCGCATGAGCCCTGAGGGGGGAAAGCGGGG</b><br><b>GATCTTCGGACCTCGCGCTAAGAGAGGAGCCTGCGTCCGATTAGCTAGTTGGCGGGTA</b><br><b>AAGGCCACCAAGGCGACGATCGGTAGCTGGTCTGAGAGGACAACCAGCCACACTGGGT</b><br><b>CTGAGACACGGCCCAGACTCCTACGGGAGGCAGCAGTGGGGAATTTTTCGCAATGGGGG</b><br><b>CAACCCTGACGAAGCAATGCCGCGTGATGAAGAAGGCCTTCGGGTTGTAAAGTCCTTT</b><br><b>CGTGGAGGACGAAAAGGTGGGTTCTAATACAATCTGCTATTGACGTGAATCCAAGAAGA</b><br><b>AGCACCGGCTAACTCCGT<b>GCCAGCAGCCGCGGTAATA</b>AATCACTAGTGAATTCGCGGCCG</b>                                                                                                |
| CCTGCAGGTCGACCATATGGGAGAGCTCCCAACGCGTTGGATGCATAGCTTGAGTATTC<br>TATAGTGTACCTAAATAGCTTGGCGTAATCATGGTCATAG                                                                                                                                                                                                                                                                                                                                                                                                                                                                                                                                                                                                                                                                                                                |
| <b>T6-AC3</b>                                                                                                                                                                                                                                                                                                                                                                                                                                                                                                                                                                                                                                                                                                                                                                                                          |
| CGACTCACTATAGGGCGAATTGGGCCCGACGTGCGCATGCTCCCGGCCGCCATGGCGGCC<br>GCGGGAATTCGATT <b>CAGGCCTAACACATGCAAGTCGAACGGTAACAGGTCCTTCGGATGC</b><br><b>TGACGAGTGGCGGACGGGTGAGTAATGCGTAGGAATCTGTCTTTTAGTGGGGACAACC</b><br><b>CAGGGAACTTGGGCTAATACCGCATGAGCCCTGAGGGGGAAAGCGGGGGATCTTCGGA</b><br><b>CCTCGCGCTAAGAGAGGAGCCTACGTCCGATTAGCTAGTTGGCGGGGTAAAGGCCACC</b><br><b>AAGGCGACGATCGGTAGCTGGTCTGAGAGGACGACCAGCCACACTGGGACTGAGACACG</b><br><b>GCCCAGACTCCTACGGGAGGCAGCAGTGGGGAATTTTTCGCAATGGGGGCAACCCTGAC</b><br><b>GAAGCAATGCCGCGTGATGAAGAAGGCCTTCGGGTTGTAAAGTCCTTTCTGAGGAC</b><br><b>GAAAAGGTGGGTTCTAATACAATCTGCTATTGACGTGAATCCAAGAAGAAGCACCGGCT</b><br><b>AACTCCGT<b>GCCAGCAGCCGCGTAATA</b>AATCACTAGTGAATTCGCGGCCGCTGCAGGTC</b>                                                                                                   |
| GACCATATGGGAGAGCTCCCAACGCGTTGGATGCATAGCTTGAGTATTCTTATAGTGT<br>CAC                                                                                                                                                                                                                                                                                                                                                                                                                                                                                                                                                                                                                                                                                                                                                      |
| <b>T6-AC4</b>                                                                                                                                                                                                                                                                                                                                                                                                                                                                                                                                                                                                                                                                                                                                                                                                          |
| ATGATTACGCCAAGCTATTTAGGTGACACTATAGAATACTCAAGCTATGCATCCAACGC<br>GTTGGGAGCTCTCCCATATGGTCGACCTGCAGGCGGCCGGAATTCAGTAGTGATT <b>CAG</b><br><b>GCCTAACACATGCAAGTCGAACGGTAACAGGTCCTTCGGATGCTGACGAGTGGCGGACGG</b><br><b>GTGAGTAATGCGTAGGAATCTGTCTTTTAGTGGGGACAACCCAGGGAACTTGGGCTA</b><br><b>ATACCGCATGAGCCCTGAGGGGGAAAGCGGGGGATCTTCGGACCTCGCGCTAAGAGAGG</b><br><b>AGCCTACGTCCGATTAGCTAGTTGGCGGGGTAAAGGCCACCAAGGCGACGATCGGTAG</b><br><b>CTGGTCTGAGAGGACGACCAGCCACACTGGGACTGAGACACGGCCCAGACTCCTACGGG</b><br><b>AGGCAGCAGTGGGGAATTTTTCGCAATGGGGGCAACCCTGACGAAGCAATGCCGCGTGG</b><br><b>ATGAAGAAGGCCTTCGGGTTGTAAAGTCCTTTCTGAGGACGAAAAGGTGGGTTCTAA</b><br><b>TACAATCTGCTATTGACGTGAATCCAAGAAGAAGCACCGGCTAACTCCGT<b>GCCAGCAGC</b></b><br><b>CGCGGTAATAATCGAATTC</b> CCGCGGCCGCCATGGCGGCCGGGAGCATGCGACGTCGGGC<br>CCAATTCGCCCTATAGTGAGTCG |

Blue: primers 63FW and 533RV (reverse-complement). Green: consensus amplified sequence.
